# Supplementary material for: PLGA-particle vaccine carrying TLR3/RIG-I ligand Riboxxim synergizes with immune checkpoint blockade for effective anti-cancer immunotherapy
Source: PubMed Central journal article supplement (PMC8131648; doi:10.1038/s41467-021-23244-3), 2021-05-18
Supplement: 41467_2021_23244_MOESM1_ESM.pdf [file 41467_2021_23244_MOESM1_ESM.pdf]

Supplementary information for:

## **PLGA-particle vaccine carrying TLR3/RIG-I ligand Riboxxim synergizes with immune checkpoint blockade for effective anti-cancer immunotherapy**

**Julia Koerner<sup>1,#</sup>, Dennis Horvath<sup>1,2,#</sup>, Valerie L. Herrmann<sup>1,+</sup>, Anna MacKerracher<sup>1</sup>, Bruno Gander<sup>3</sup>, Hideo Yagita<sup>4</sup>, Jacques Rohayem<sup>5,6</sup>, and Marcus Groettrup<sup>\*1,7</sup>**

<sup>1</sup>Division of Immunology, Department of Biology, University of Konstanz, Konstanz, Germany

<sup>2</sup>Centre for the Advanced Study of Collective Behaviour, University of Konstanz, Konstanz, Germany

<sup>3</sup>Institute of Pharmaceutical Sciences, ETH Zürich, Zürich, Switzerland

<sup>4</sup>Department of Immunology, Juntendo University School of Medicine, Tokyo, Japan

<sup>5</sup>Riboxx GmbH, BioInnovationszentrum, Dresden, Germany

<sup>6</sup>Institute of Virology, Medical Faculty Carl Gustav Carus, Dresden University of Technology, Dresden, Germany

<sup>7</sup>Biotechnology Institute Thurgau at the University of Konstanz (BITg), Kreuzlingen, Switzerland

<sup>#</sup>These authors contributed equally: Julia Koerner and Dennis Horvath

<sup>+</sup>Present address: Boehringer Ingelheim Pharma, Cancer Immunology + Immune Modulation  
Biberach/ Riß, Germany

<sup>\*</sup>Corresponding author: Marcus Groettrup, [marcus.groettrup@uni-konstanz.de](mailto:marcus.groettrup@uni-konstanz.de)

**SUPPLEMENTARY FIGURES**

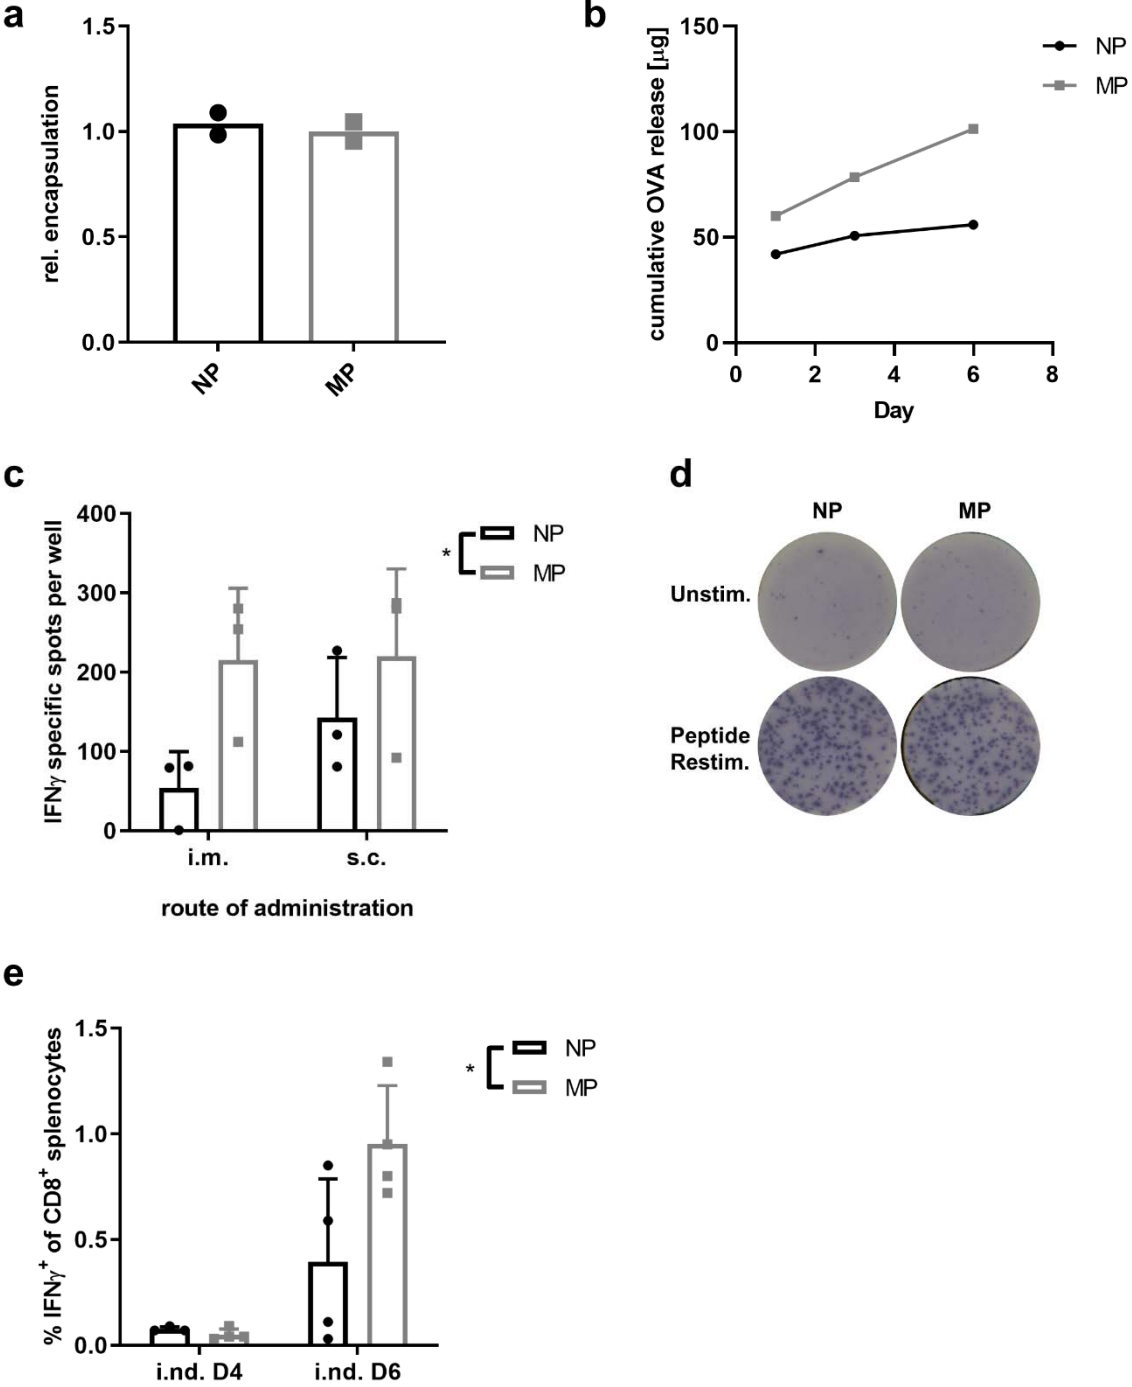

**Supplementary Fig. 1 | Comparison of PLGA nanoparticles (NP) and microparticles (MP) with respect to encapsulation efficiency, release kinetics and T cell priming. a**, Relative encapsulation efficiency of OVA into PLGA-NP compared to PLGA-MP. 5 mg of NP (black circles, n=2) or MP-OVA/Riboxsim (grey squares, n=2) (250 µg OVA and 2.5µg Riboxsim)

were dissolved in 50  $\mu$ l of DMSO. Protein content in the supernatant (SN) was measured by MicroBCA™ and was normalized to the protein content in PLGA-MP. **b**, In vitro release profile of NP and MP-OVA/Riboxsim. 5 mg of NP (black circles, n=2) or MP-OVA/Riboxsim (grey squares, n=2) were incubated at 37°C in 200  $\mu$ l PBS (pH 7.4). Samples were taken on day 1, 3, and 6 and protein content in the SN was determined by MicroBCA™ assay. The curves present the cumulative release over indicated days, showing slightly increased release profiles for PLGA-MP. **c**, C57BL/6J mice were immunized with 5 mg of either NP (black circles, n=3) or MP-OVA/Riboxsim (grey squares, n=3) (250  $\mu$ g OVA; 2.5 $\mu$ g Riboxsim) via the intramuscular (i.m.) or subcutaneous (s.c.) route. On day 6 post immunization, an ELISpot assay for IFN $\gamma$  of splenocytes was performed after ex vivo re-stimulation with SIINFEKL peptide. Statistics: two-way ANOVA with with \* $P < 0.05$ . **d**, Representative ELISpot images of IFN $\gamma$ -positive spot formation of the indicated groups (Peptide Restim.) compared to unstimulated wells (Unstim.), showing similar IFN $\gamma$  responses between PLGA-NP and PLGA-MP treatments. **e**, C57BL/6J mice were immunized with either NP (black circles, n=4) or MP-OVA/Riboxsim (grey squares, n=4) (0.5  $\mu$ g OVA/mouse; 0.025  $\mu$ g Riboxsim/mouse) via intranodal (i.nd.) injection. The efficacy of the cytotoxic T cell response to OVA/Riboxsim particle vaccination was determined on day 4 (D4) and day 6 (D6) after immunization by ELISpot assay for IFN $\gamma$ . The values in (c) and (d) are given as IFN $\gamma$ -specific spots per well. Background levels of unstimulated samples were subtracted. Statistical significance was determined by two-way ANOVA with \* $P < 0.05$ . All data represent means  $\pm$  SD.

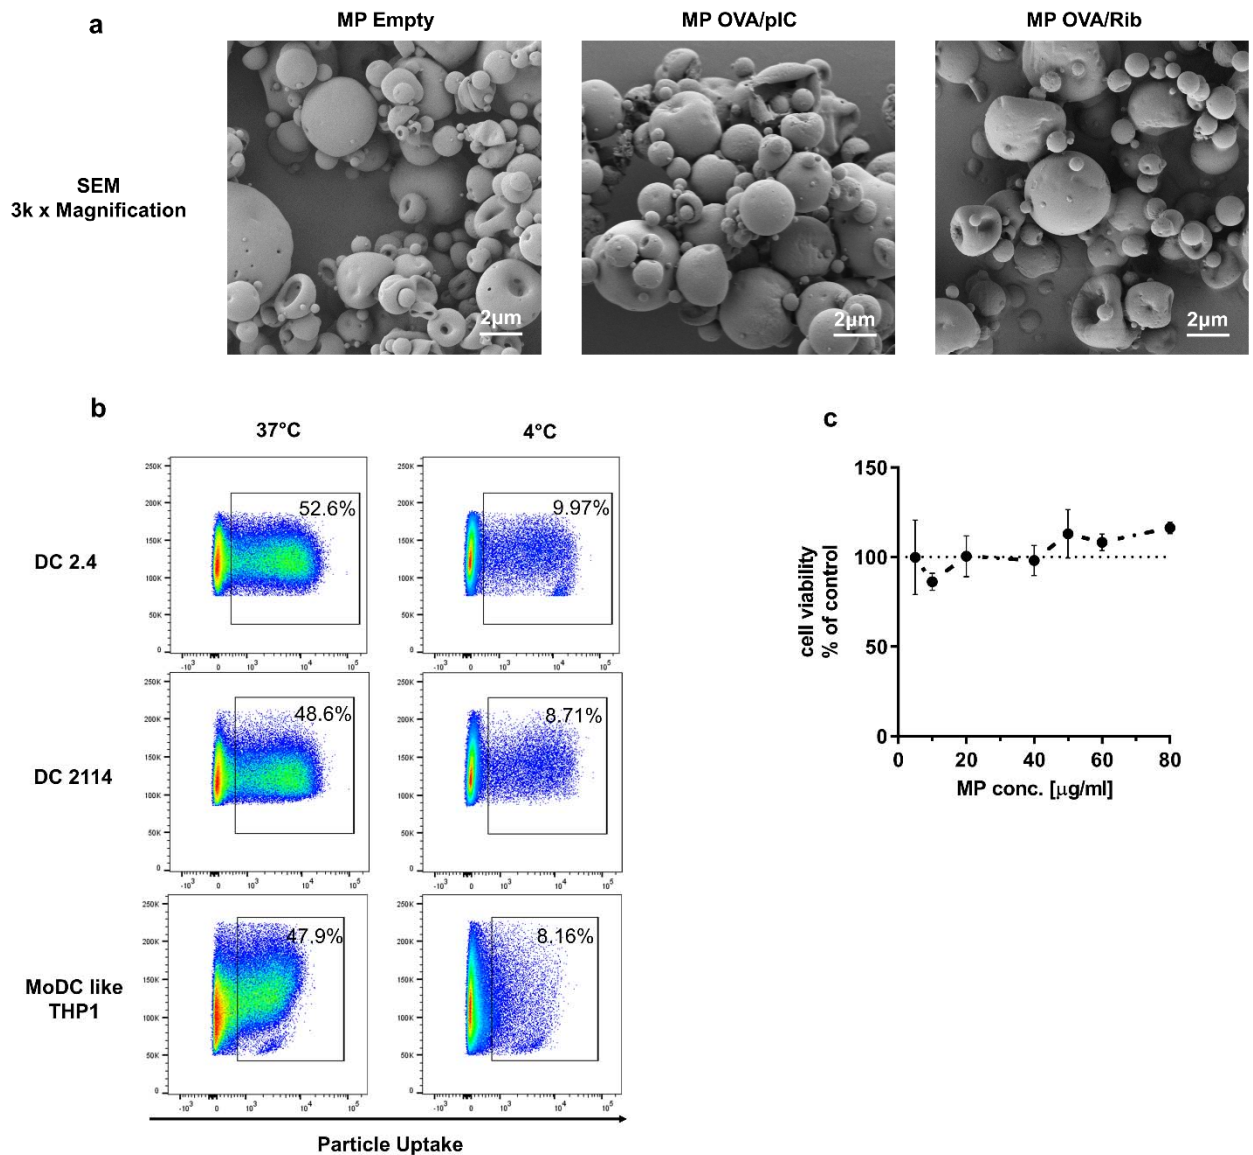

**Supplementary Fig. 2 | Physicochemical characterization and uptake of PLGA-MP. a,** Morphology and particle sizes of PLGA-MP loaded with 250  $\mu\text{g}$  OVA and 2.5  $\mu\text{g}$  dsRNA analogues as indicated above the images were analyzed by scanning electron microscopy (SEM); scale bar: 2  $\mu\text{m}$ , magnification x3000. SEM images were acquired from 3 different particle batches with similar results. Scale bars have been added using ImageJ (FIJI) v1.53c. **b,** Uptake of fluorescently labeled PLGA-MP-QD705/OVA/Riboxim was analyzed by flow cytometric analysis of QD705 (QuantumDot705) positive signals. Murine DC2.4 and MutuDC2114 cells as well as in vitro differentiated human monocyte-derived dendritic cell

(MoDC)-like THP-1 cells were incubated with MP-QD705/OVA/Riboxsim for 6 h. Incubation at 4°C served as negative control for no-uptake. **c**, Viability of  $5 \times 10^4$  mouse BMDCs (n=3) after addition of indicated concentrations of PLGA-MP-OVA/Riboxsim at 48 hours. Deep Blue Viability™ assay was performed to determine cell viability compared to control dead cells and untreated cells. Data show means  $\pm$  SD from three independent experiments with similar outcome.

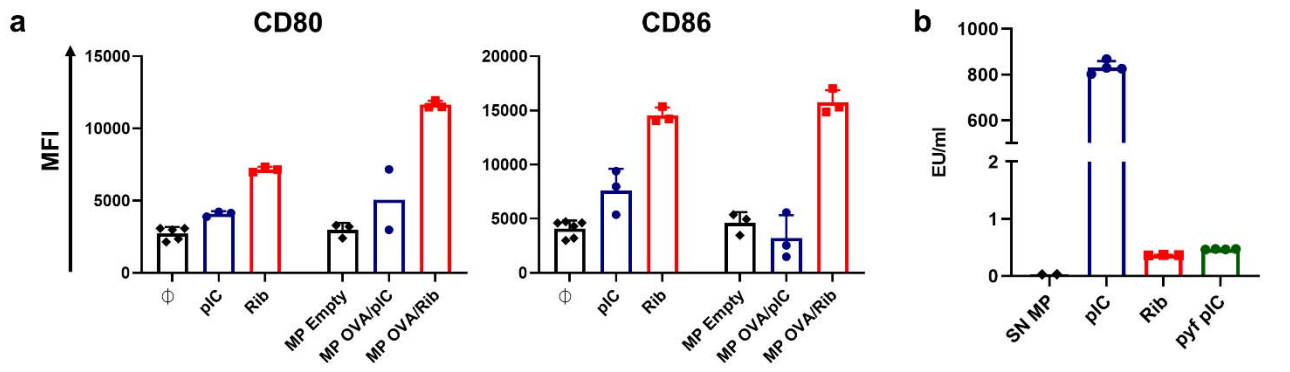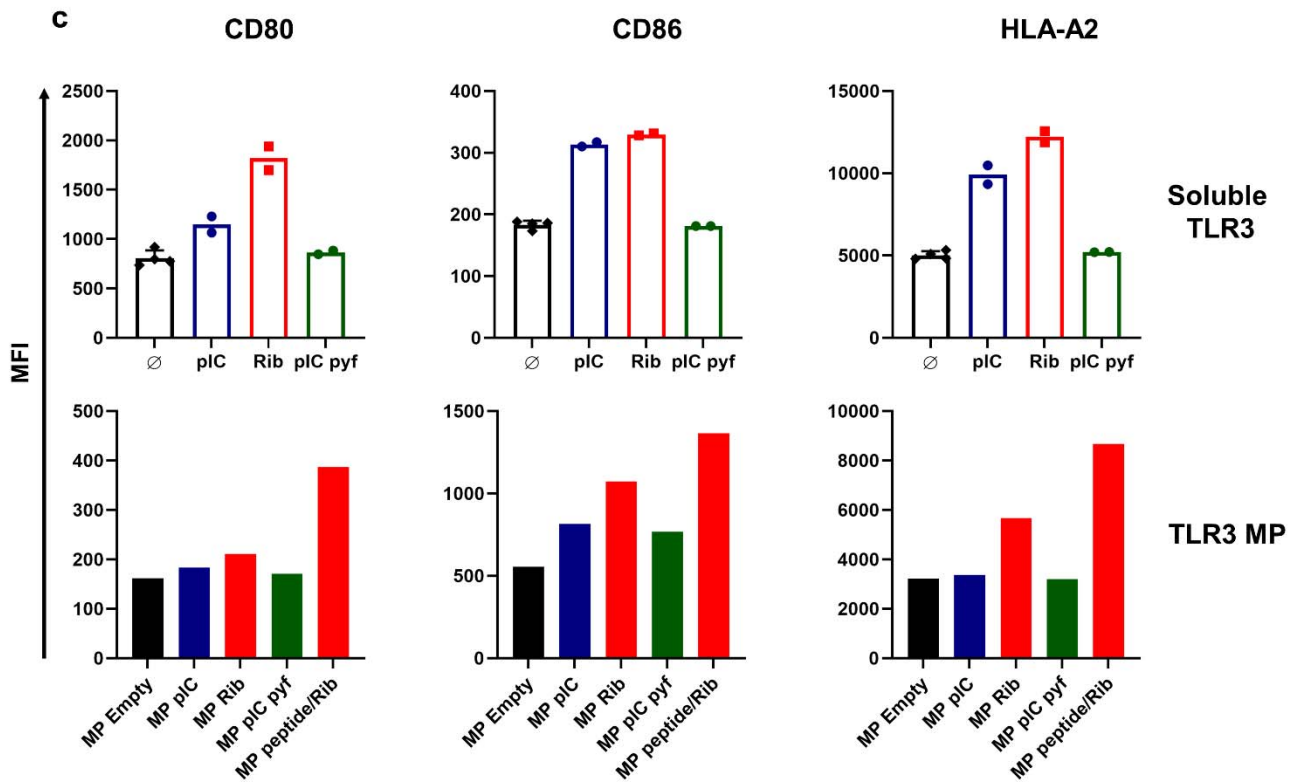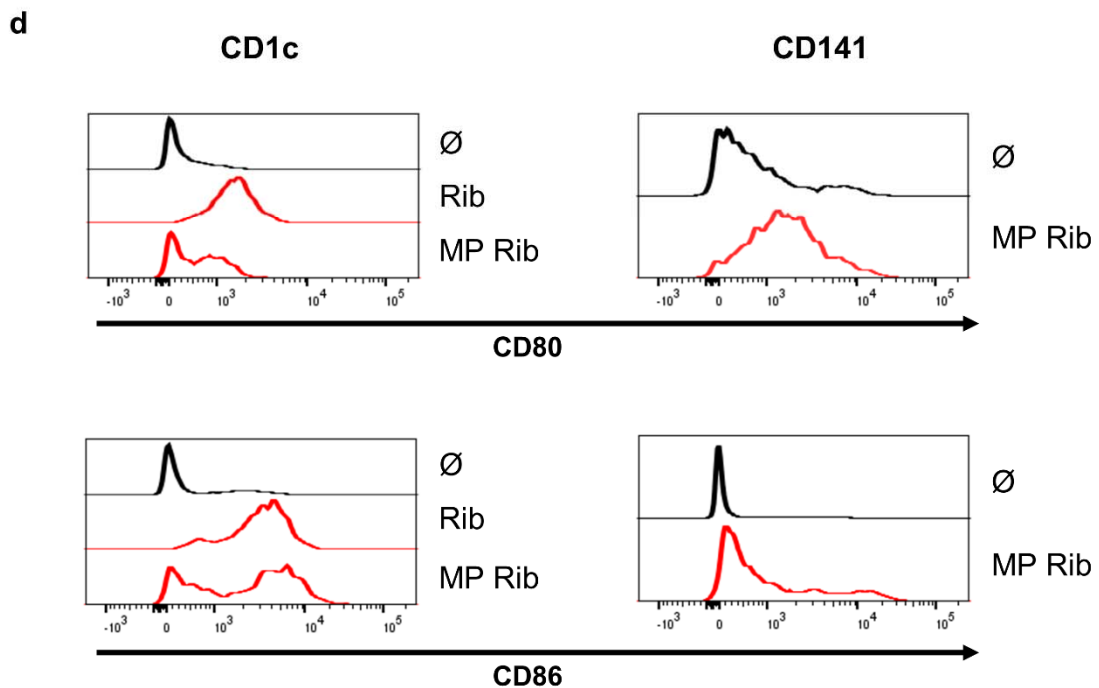

**Supplementary Fig. 3 | Activation and maturation of mouse and human dendritic cells in presence of Riboxxim versus polyI:C.** **a**, Surface maturation markers CD80 and CD86 were analyzed by flow cytometric analysis after incubation of mouse BMDCs with 20 µg/mL soluble polyI:C (pIC, blue circles, n=3), Riboxxim (Rib, red squares, n=3) or with 10 µg/mL PLGA-MP loaded with 250 µg OVA protein and 2.5 µg of polyI:C (MP OVA/pIC, blue circles, n=2-3) or Riboxxim (MP OVA/Rib, red squares, n=3) for 48 h. No treatment (Ø, black diamonds, n=5) or incubation with empty MP (MP Empty, black diamonds, n=3) were used as controls. **b**, Endotoxin levels of used dsRNA analogues (polyI:C, pIC, blue circles, n=4; Riboxxim, Rib, red squares, n=3, pyrogen-free polyI:C, pyf pIC, green circles, n=4) as wells as supernatants of empty PLGA particles (SN MP, black diamonds, n=2) dissolved in PBS (pH7.4) for 24 h were determined in vitro by chromogenic LAL Endotoxin Assay. **c**, Cell surface expression of co-stimulatory molecules CD80 and CD86 and of the MHC class I molecule HLA-A2 was analyzed in in vitro differentiated THP-1 monocytoïd cells 24 h after stimulation with 20 µg/mL soluble dsRNA adjuvants (upper panels, n=2) or 48 h after incubation with 10µg/ml of indicated PLGA-MP containing only dsRNA analogues (2.5 µg) (n=1) or PLGA-MP carrying 10 mg peptide co-encapsulated with 2.5 µg Riboxxim (MP peptide/Rib, red, n=1) (lower panel), showing improved DC activation in presence of antigen and Riboxxim in PLGA-MP. Mean fluorescence intensity (MFI) data are presented as means ± SD (for n ≥ 3) from at least 2 independent experiments with similar outcome. **d**, Histogram of DC activation marker CD80 and CD86 of primary peripheral human blood CD1c<sup>+</sup> and CD141<sup>+</sup> DCs 24 h after pulsing with 20 µg/mL Riboxxim (Rib, red) or PLGA-MP charged with 2.5 µg Riboxxim (MP Rib, red). Cells left unstimulated (Ø, black) served as control.

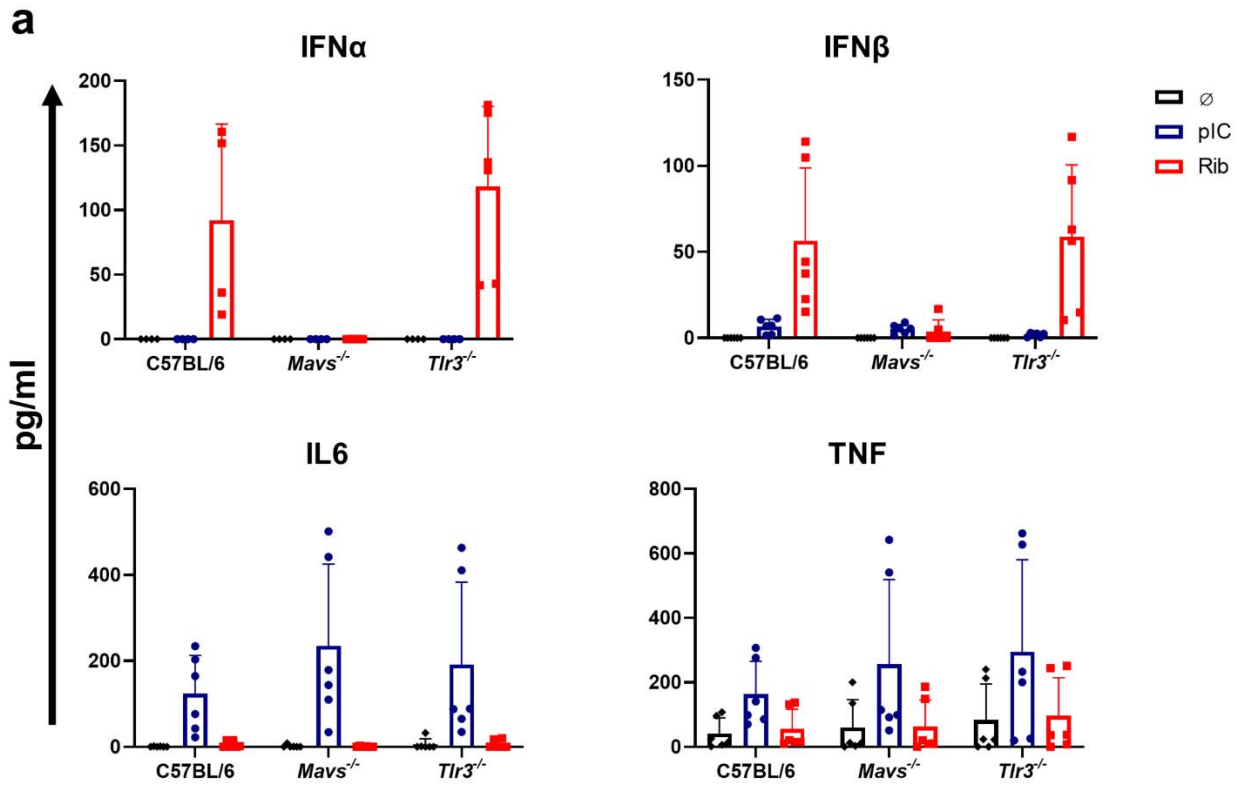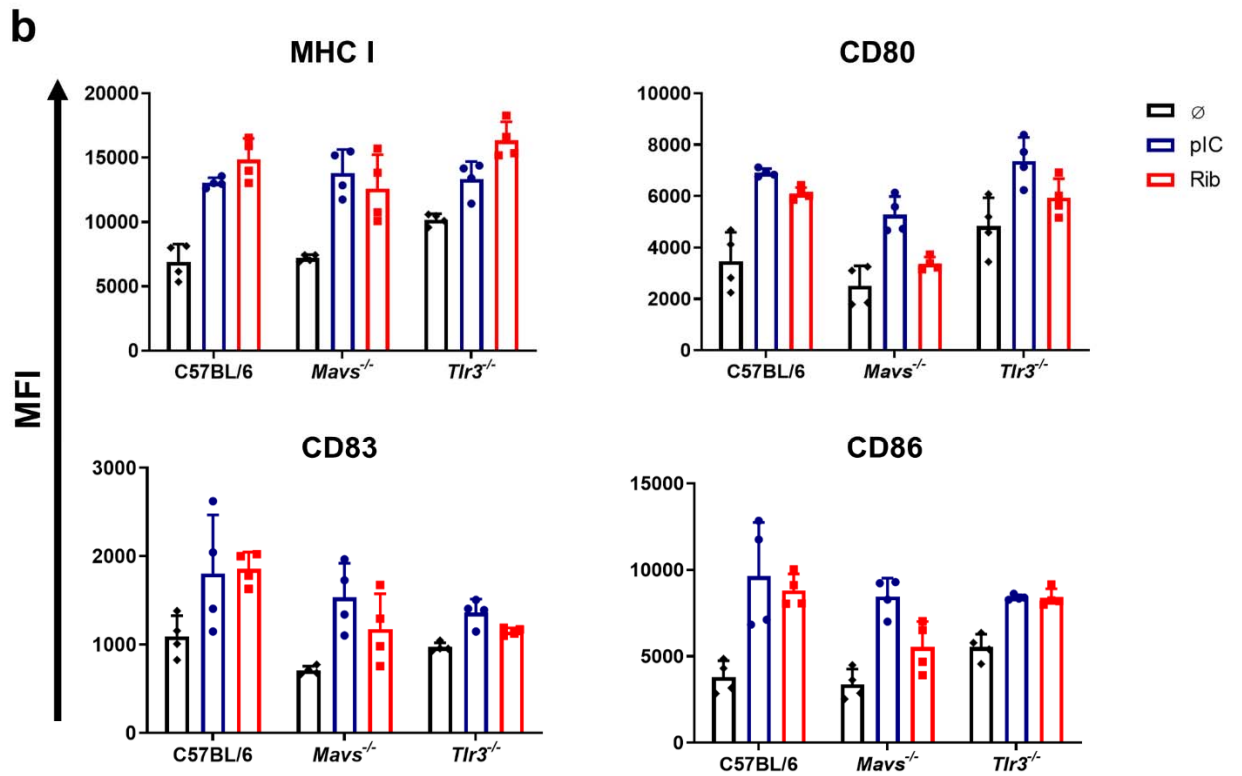



**Supplementary Fig. 4 | DC maturation and cytokine profile of *Mavs*<sup>-/-</sup> and *Tlr3*<sup>-/-</sup> deficient BMDCs after stimulation with Riboxsim or polyI:C.** Bone marrow-derived dendritic cells (BMDCs) from wild-type C57BL/6 mice, or mice genetically deficient for *Mavs* or *Tlr3* were stimulated with 20 µg/mL soluble polyI:C (pIC, blue circles) or Riboxsim (Rib, red squares) for 24 h. **a**, Levels of IFNα (n=4), IFNβ (n=6), IL-6 (n=6) and TNF (n=6) in BMDC culture supernatants were determined by ELISA. **b**, Mean fluorescence intensity (MFI) of surface maturation markers CD80 (n=4) and CD86 (n=4), co-stimulatory molecule CD83 (n=4) and MHC class I (H2-K<sup>b</sup>, n=4) were analyzed by flow cytometry. Data are presented as means ± SD of pooled data from 2 independent experiments with similar outcome.

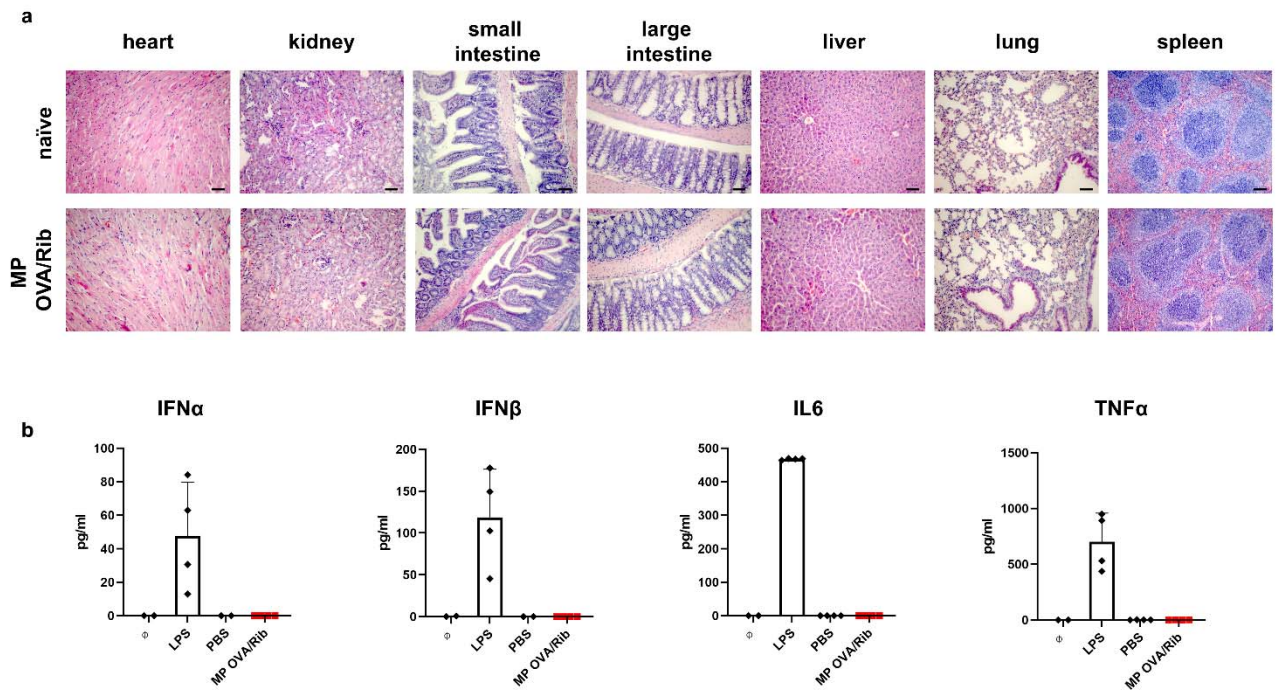

**Supplementary Fig. 5 | Safety assessment of PLGA microparticle vaccination. a,** C57BL/6J mice (n=5) were immunized s.c. with 5 mg microparticles (MP) loaded with 250  $\mu$ g OVA and 2.5  $\mu$ g Riboxsim (MP OVA/Rib, lower panel) in comparison to PBS treated control mice (naïve, upper panel). After 6 days, indicated organs were collected, paraffin-embedded and stained for H&E. Representative images (x200) are shown. Scale bars in top row represent 50  $\mu$ m. Images in bottom row are of identical magnification. **b,** C57BL/6J mice (n=5) were immunized s.c. with 5 mg MP loaded with 250  $\mu$ g OVA and 2.5  $\mu$ g Riboxsim (MP OVA/Rib, red squares). Six days post immunization serum was collected and analyzed for type I interferons IFN $\alpha$  and IFN $\beta$  and for pro-inflammatory cytokine production (TNF, IL-6). Intraperitoneal injection of 10mg/kg LPS into C57BL/6 mice (black triangles, n=4) served as positive control for systemic cytokine secretion, whereas naïve C57BL/6 mice (black triangles, n=2) or C57BL/6 mice injected with 200 $\mu$ l PBS (black triangles, n=4) served as control mice. Data are presented as means  $\pm$  SD.

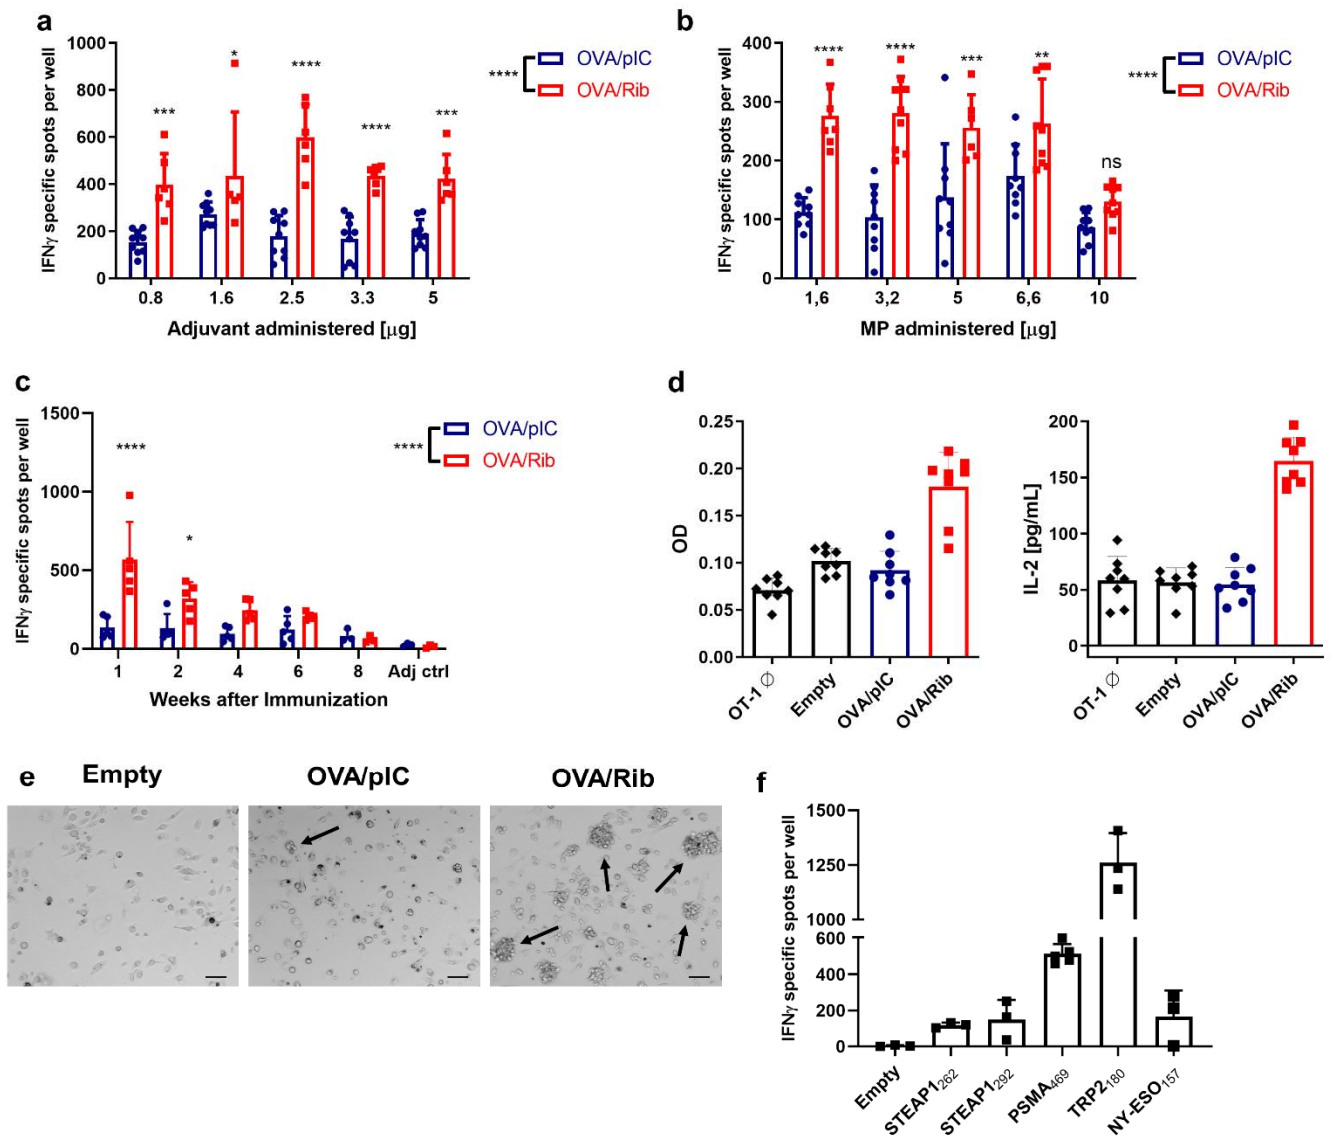

**Supplementary Fig. 6 | Strength and duration of cytotoxic T cell response after vaccination of mice with PLGA microparticles.** C57BL/6J mice were immunized s.c. with 5 mg of different MP charged with 250  $\mu$ g OVA and 0.8  $\mu$ g - 5  $\mu$ g of polyI:C (pIC, blue circles, n=9) or Riboxsim (Rib, red squares, n=5-6) (a) or with 1.6 mg - 10 mg (b) of PLGA-MP-OVA/polyI:C (OVA/pIC, blue circles, n=9) or PLGA-MP-OVA/Riboxsim (OVA/Rib, red squares, n=6-9), respectively. After 6 days, splenocytes were isolated and analyzed for IFN $\gamma$  production by ELISPOT assay. Background IFN $\gamma$  spot formation (wells without peptide stimulation) was subtracted. The amount of IFN $\gamma$  specific spots per well was analyzed by

automatic spot counting. Statistics: two-way ANOVA followed by Šídák's multiple comparisons test. \* $P < 0.05$ ; \*\* $P < 0.01$ ; \*\*\* $P < 0.001$ ; \*\*\*\* $P < 0.0001$ ; ns, not significant. **c**, Kinetics of the CTL response after a single immunization with MP-OVA/polyI:C or MP-OVA/Riboxsim. C57BL/6J mice (n=3-5) were immunized s.c. with 5 mg MP loaded with 250  $\mu\text{g}$  OVA and 2.5  $\mu\text{g}$  of dsRNA adjuvant (OVA/pIC, blue circles; OVA/Rib, red squares) or MP only carrying 2.5  $\mu\text{g}$  dsRNA adjuvant as a control (Adj ctrl, n=2). IFN $\gamma$  production of splenocytes was analyzed by ELISpot assay 6 days, 14 days, 28 days, 42 days and 56 days post immunization as described in (a,b). Statistics: two-way ANOVA followed by Šídák's multiple comparisons test. \* $P < 0.05$ ; \*\*\*\* $P < 0.0001$ . **d**, In vitro (cross-) presentation of PLGA-MP-OVA charged with polyI:C or Riboxsim. BMDCs (n=8) of naïve C57BL/6J mice were pulsed with 10  $\mu\text{g}/\text{mL}$  MP-OVA/polyI:C (OVA/pIC, blue circles), MP-OVA/Riboxsim (OVA/Rib, red squares), or empty control MP (Empty, black diamonds) or left unpulsed (OT-1  $\emptyset$ , black diamonds). After 24 hours, cells were incubated with either the OVA-specific CD8<sup>+</sup> T cell hybridoma B3Z (left panel) or with DOBW hybridoma cells (right panel) for 18 hours. Activation of B3Z was detected in a colorimetric *LacZ* assay and supernatants of DOBW hybridomas were analyzed for IL-2 production by ELISA. Summary of two experiments with means  $\pm$  SEM is shown. **e**, Microscopic images of blasted OT-I cells (arrows) 24 hours after incubation with PLGA-MP pulsed BMDCs. Images are derived from two independent experiments with similar outcome. Microscopy images (x10) were acquired using AxioVision rel. 4.8.2 software equipped at the Axioplan 2 microscope (Carl Zeiss Imaging Inc.). Scale bars represent 50  $\mu\text{m}$ . **f**, Tumor peptide-specific IFN $\gamma$  production by splenocytes of AAD mice (n=3-5) immunized with PLGA-MP charged with 2.5  $\mu\text{g}$  Riboxsim and 50  $\mu\text{g}$  of indicated tumor peptide epitopes. ELISpot analyses was performed as described above. All data are presented as means  $\pm$  SD of pooled data from at least two independent experiments with similar outcome.

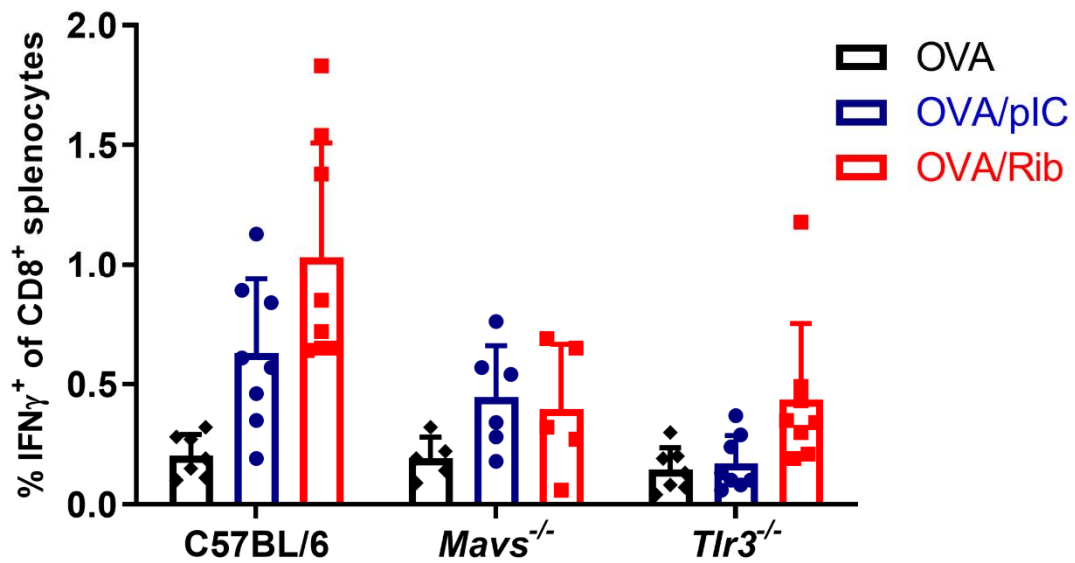

**Supplementary Fig. 7 | Analysis of cytotoxic T cell response after vaccination of WT, *Mavs*<sup>-/-</sup> or *Tlr3*<sup>-/-</sup> mice with PLGA microparticles.** C57BL/6J mice (n=7-8), *Mavs*<sup>-/-</sup> mice (n=5-6) and *Tlr3*<sup>-/-</sup> mice (n=7-8) were immunized s.c. with 5 mg MP charged with 250  $\mu$ g OVA and 2.5  $\mu$ g dsRNA adjuvant (polyI:C, OVA/pIC, blue circles; Riboxsim, OVA/Rib, red squares). Six days post immunization, activation of antigen-specific cytotoxic T lymphocytes was monitored by intracellular cytokine staining for IFN $\gamma$ <sup>+</sup> of CD8<sup>+</sup> splenocytes. Data are presented as means  $\pm$  SD of pooled data from three independent experiments with similar outcome.

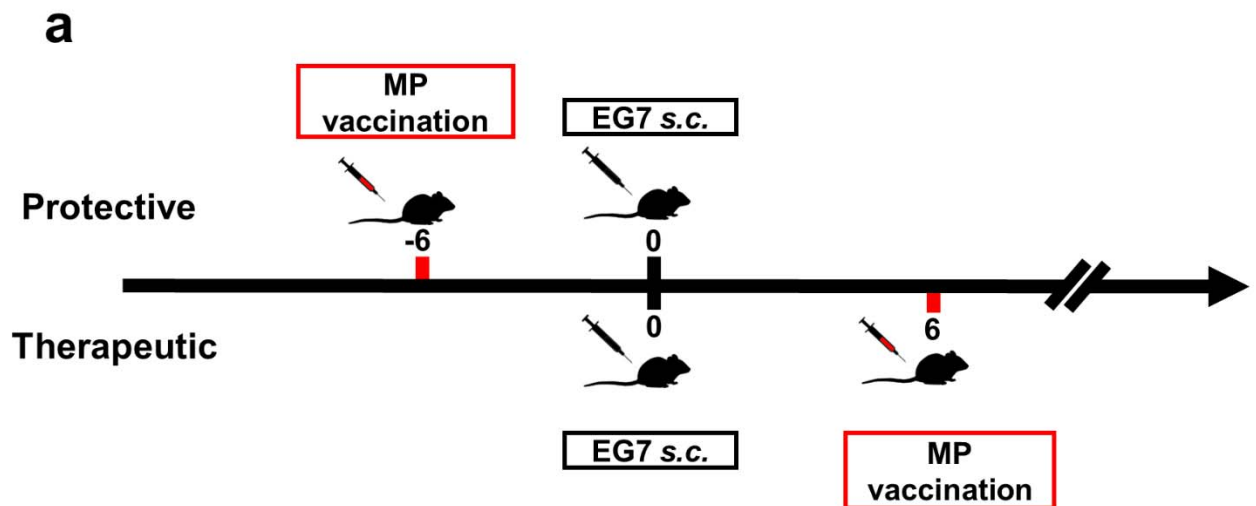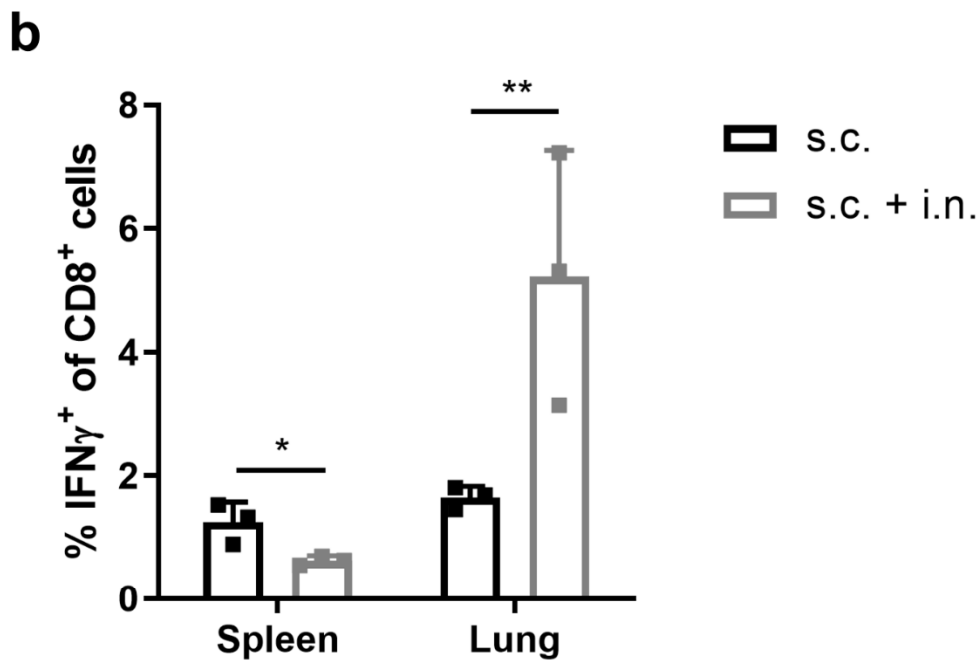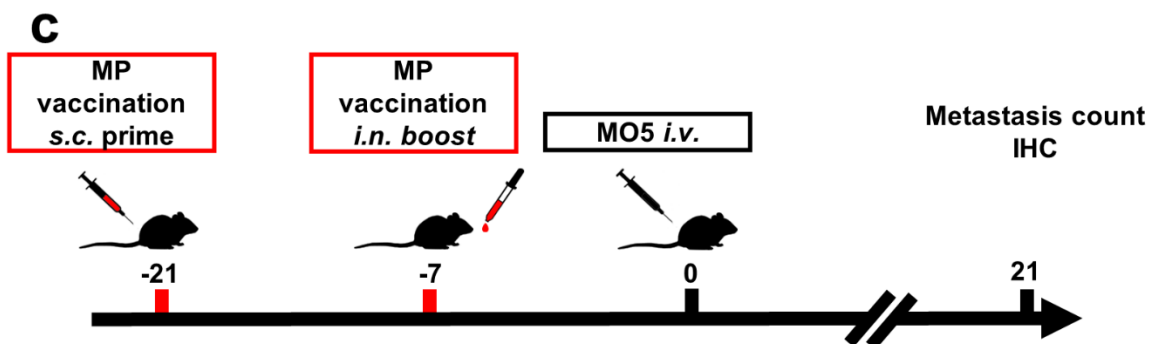

Supplementary Fig. 8 | PLGA-microparticle (MP) vaccination directs anti-tumor response into the tumor microenvironment. **a**, Experimental scheme relevant to Fig. 5a,c, **b**,

Tumor-free C57BL/6J mice were either immunized with a single subcutaneous (s.c.) vaccination of PLGA-MP-OVA/Riboxim (s.c., black squares) or received systemic subcutaneous prime and local intranasal (i.n.) boost application (s.c. + i.n., grey squares) of PLGA-MP-OVA/Riboxim. 6 days after the last immunization, the percentage of IFN $\gamma$  – positive CD8<sup>+</sup> cells in spleen and lung were analyzed by flow cytometry, indicating direct recruitment of tumor antigen-specific cytotoxic T lymphocytes into the tumor site. Data are presented as means  $\pm$  SD. The experiment was repeated once with similar results. Statistics: two-way ANOVA with Šídák's multiple comparisons test. \* $P$  < 0.05; \*\* $P$  < 0.01. **c**, Experimental scheme relevant to Fig. 5e. Abbreviations: i.v., intravenous; IHC, immunohistochemistry.

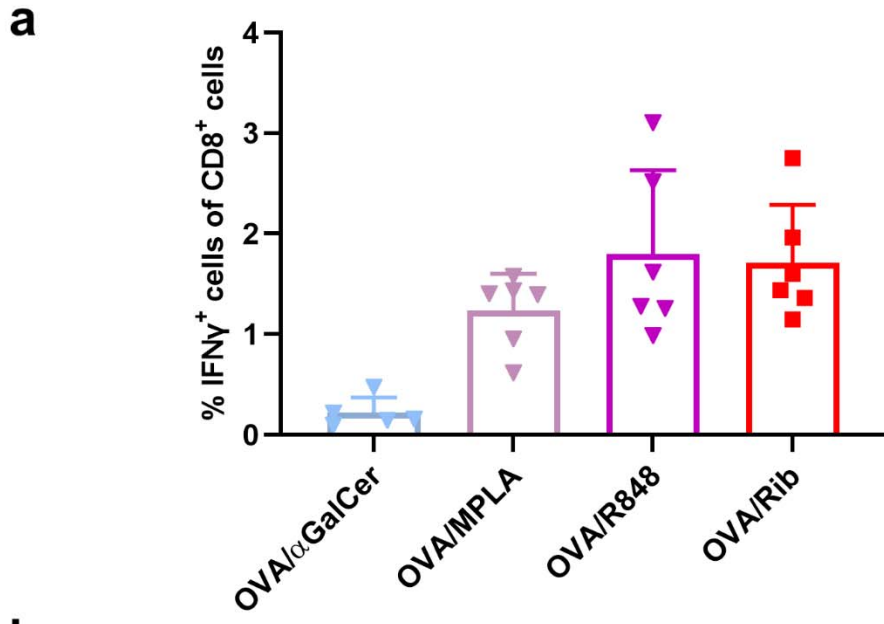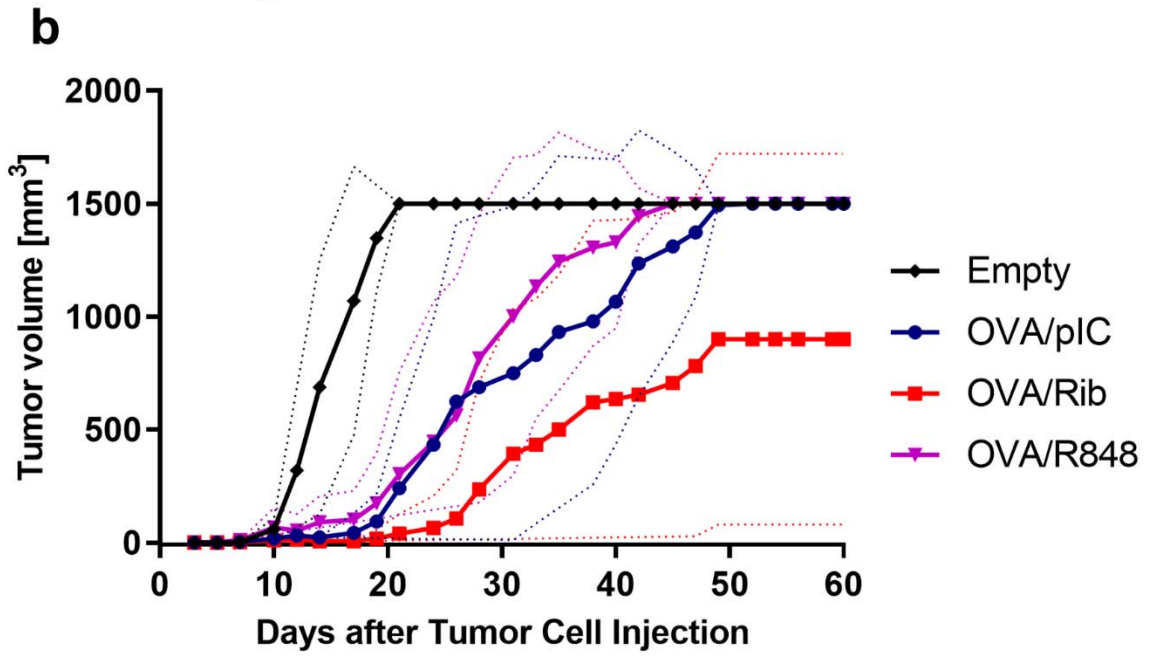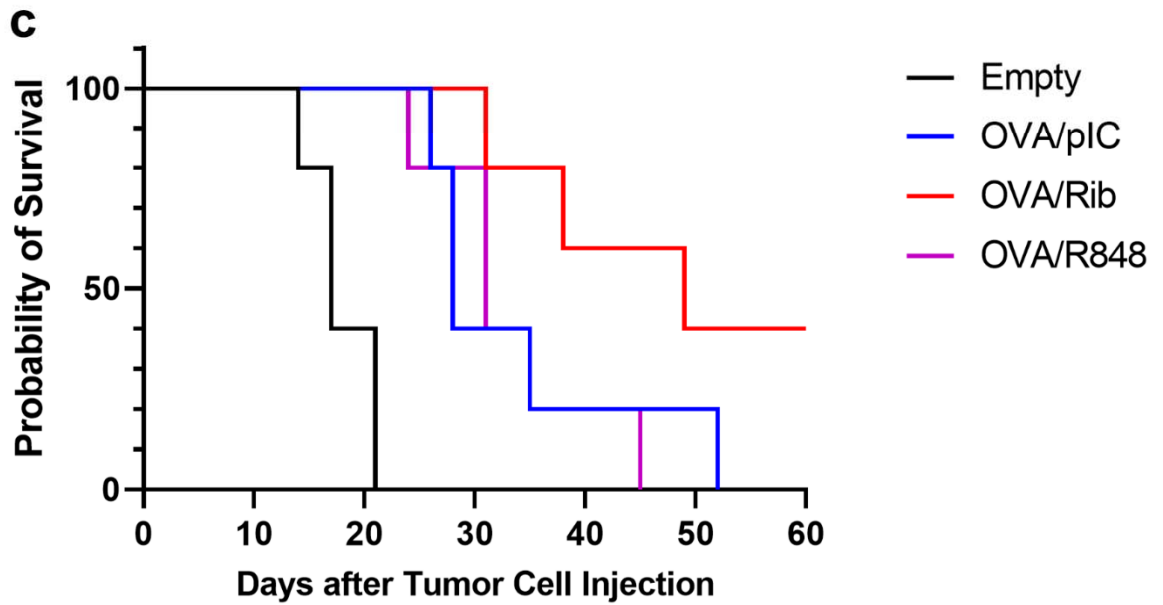



**Supplementary Fig. 9 | Comparative analysis of various PLGA-microparticle (MP) encapsulated adjuvants in T cell activation and antitumor efficacy.** **a**, C57BL/6J mice were immunized subcutaneously (s.c.) with 5 mg MP charged with 250  $\mu$ g OVA and 2.5  $\mu$ g  $\alpha$ -GalCer (OVA/ $\alpha$ GalCer, blue triangles, n=5), MPLA (OVA/MPLA, lilac triangles, n=6), Resiquimod (OVA/R848, purple triangles, n=6) or Riboxxim (OVA/Rib, red squares, n=6). Six days post immunization, antigen-specific cytotoxic T lymphocyte activation was monitored by intracellular cytokine staining for IFN $\gamma$ <sup>+</sup> of CD8<sup>+</sup> splenocytes. Data are presented as means  $\pm$  SD representing pooled data derived from two independent experiments. **b,c**, C57BL/6J mice were s.c. challenged with 5x10<sup>5</sup> E.G7-OVA-luc<sup>+</sup> cells. As soon as palpable tumors were detectable, mice were immunized with PLGA-MP-OVA/polyI:C (OVA/pic, blue circles, n=5), MP-OVA/Riboxxim (OVA/Rib, red squares, n=5), MP-OVA/Resiquimod (OVA/R848, purple triangles, n=5) or empty MP (Empty, black diamonds, n=5). Tumor growth curves (b) and Kaplan-Meier analysis of overall survival (c) are presented.

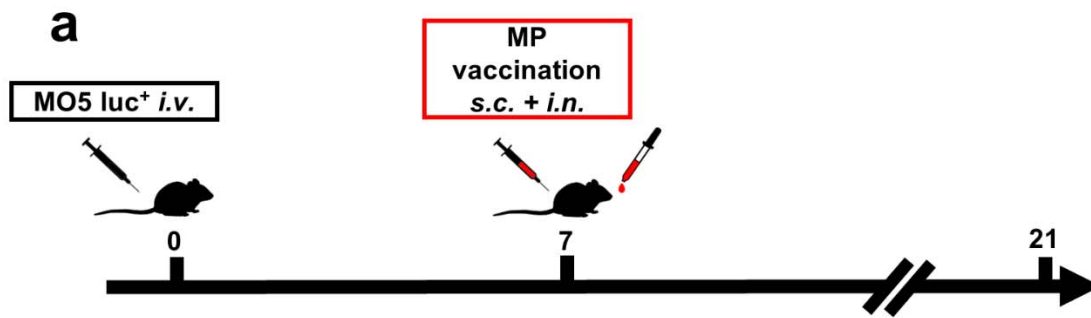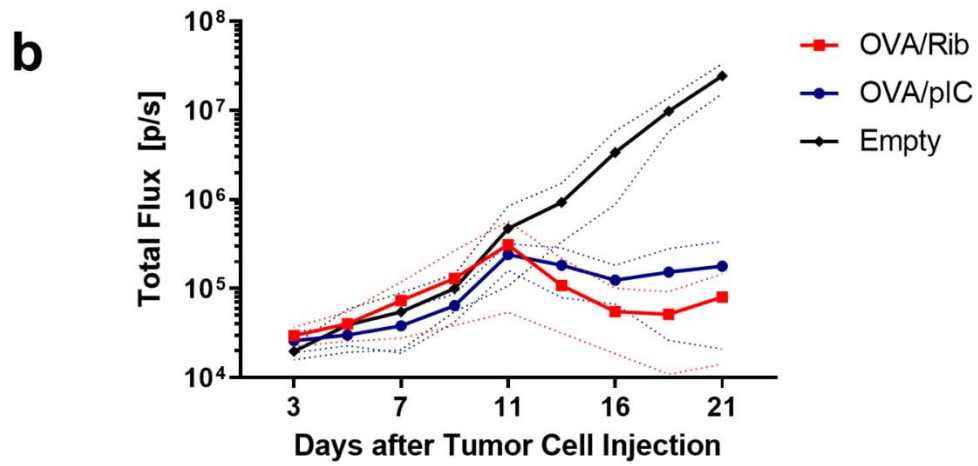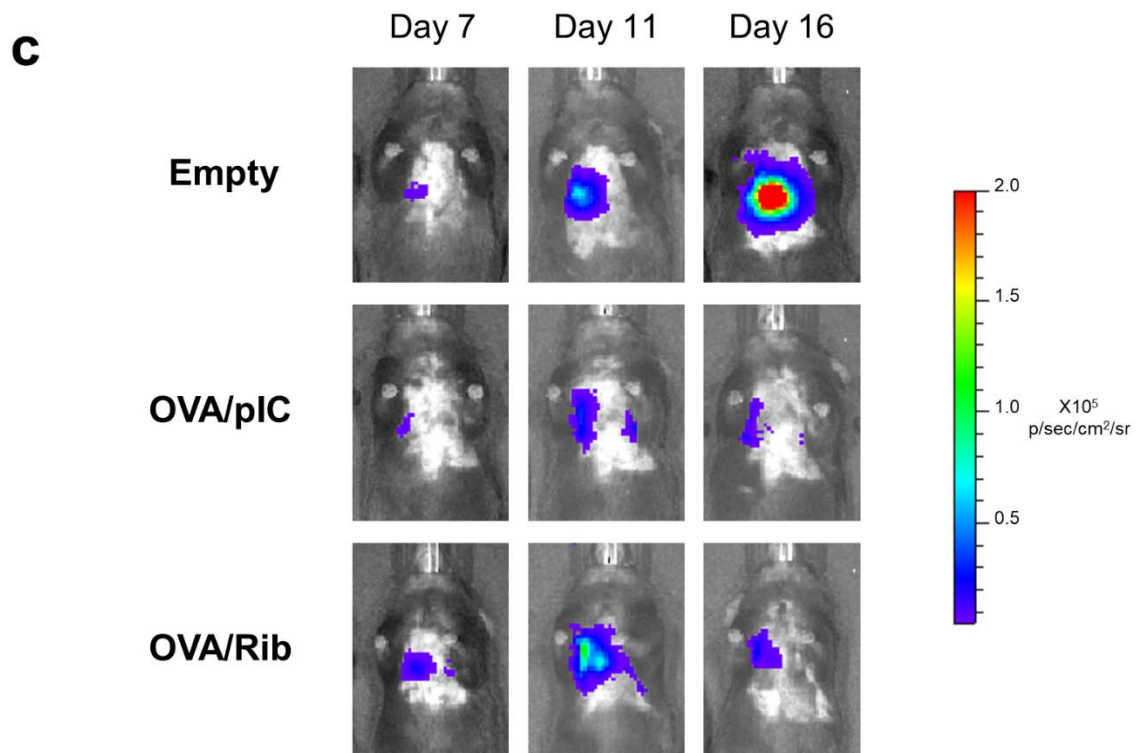

**Supplementary Fig. 10 | Antitumor efficacy of PLGA-MP containing tumor antigens and Riboxxim in a therapeutic lung metastasis model. a,** Experimental setup of the therapeutic PLGA-MP treatment in the pulmonary metastasis model. C57BL/6J mice were injected intravenously (i.v.) with  $1 \times 10^5$  OVA/Luciferase-expressing MO5 melanoma cells (MO5-luc<sup>+</sup>). As soon as bioluminescent signals were detectable in the lungs, mice were immunized by double-route immunization of s.c. administration of 5 mg MP charged with 250  $\mu$ g OVA and 2.5  $\mu$ g polyI:C (OVA/pIC, blue circles, n=5) or Riboxxim (OVA/Rib, red squares, n=5) and intranasal (i.n.) vaccination with 2.5 mg of the respective microparticles corresponding to 125  $\mu$ g tumor antigen and 1.25  $\mu$ g dsRNA adjuvants. Mice immunized with empty microparticles via the same regimen served as control (Empty, black diamonds, n=5). **b,** Tumor growth was quantitatively monitored over time by bioluminescence. Luminescent signal intensities were averaged from manually set ROI (regions of interest) and are presented as total flux (photons/seconds p/s). **c,** Representative IVIS® images on day 7, day 11 and day 16 after tumor cell inoculation demonstrating anti-tumor response and tumor regression after therapeutic PLGA-MP vaccination. Scaling of the pseudo color bioluminescent signals is depicted next to the luminescent images and presented as photons/seconds/cm<sup>2</sup>/steradian (p/sec/cm/sr). The experiment was performed three times with similar outcome.

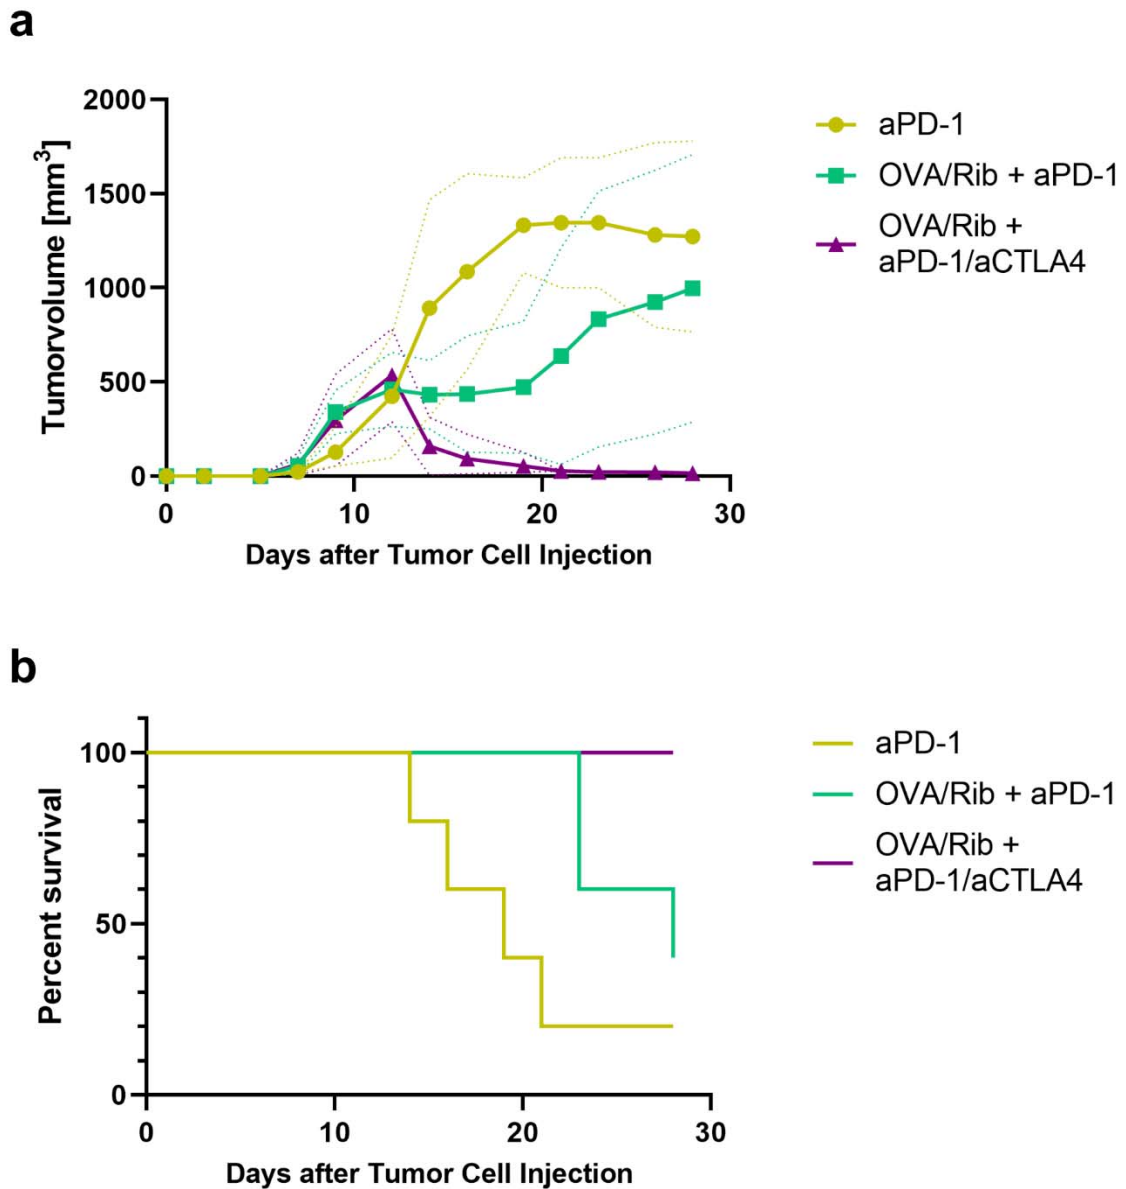

**Supplementary Fig. 11 | Immune checkpoint blockade synergizes with therapeutic PLGA-MP cancer immunotherapy. a,b**, E.G7-OVA-luc<sup>+</sup> tumors bearing C57BL/6J mice (n=5) were treated right after appearance of palpable tumors with PLGA-MP (250  $\mu$ g OVA, 2.5 $\mu$ g Riboxsim) in combination with systemic anti-PD-1 (2000  $\mu$ g/mouse) mAb (OVA/Rib + aPD-1, green squares, n=5) or with anti-CTL-4 (250  $\mu$ g/mouse)/anti-PD-1 (2000 $\mu$ g/mouse) mAb (OVA/Rib + aPD-1/aCTLA4, purple triangles, n=5). As a control, C57BL/6 mice received anti-PD-1 (2000  $\mu$ g/mouse) monotherapy (aPD-1, light green circles, n=5). Immune checkpoint

blockade was performed by i.p. injections of the antibodies on day 2, 4, 6 and day 8 post vaccination. Graphs with tumor growth curves (a) and Kaplan-Meier overall survival over time (b) are presented. Data were replicated in two independent experiments with similar outcome.

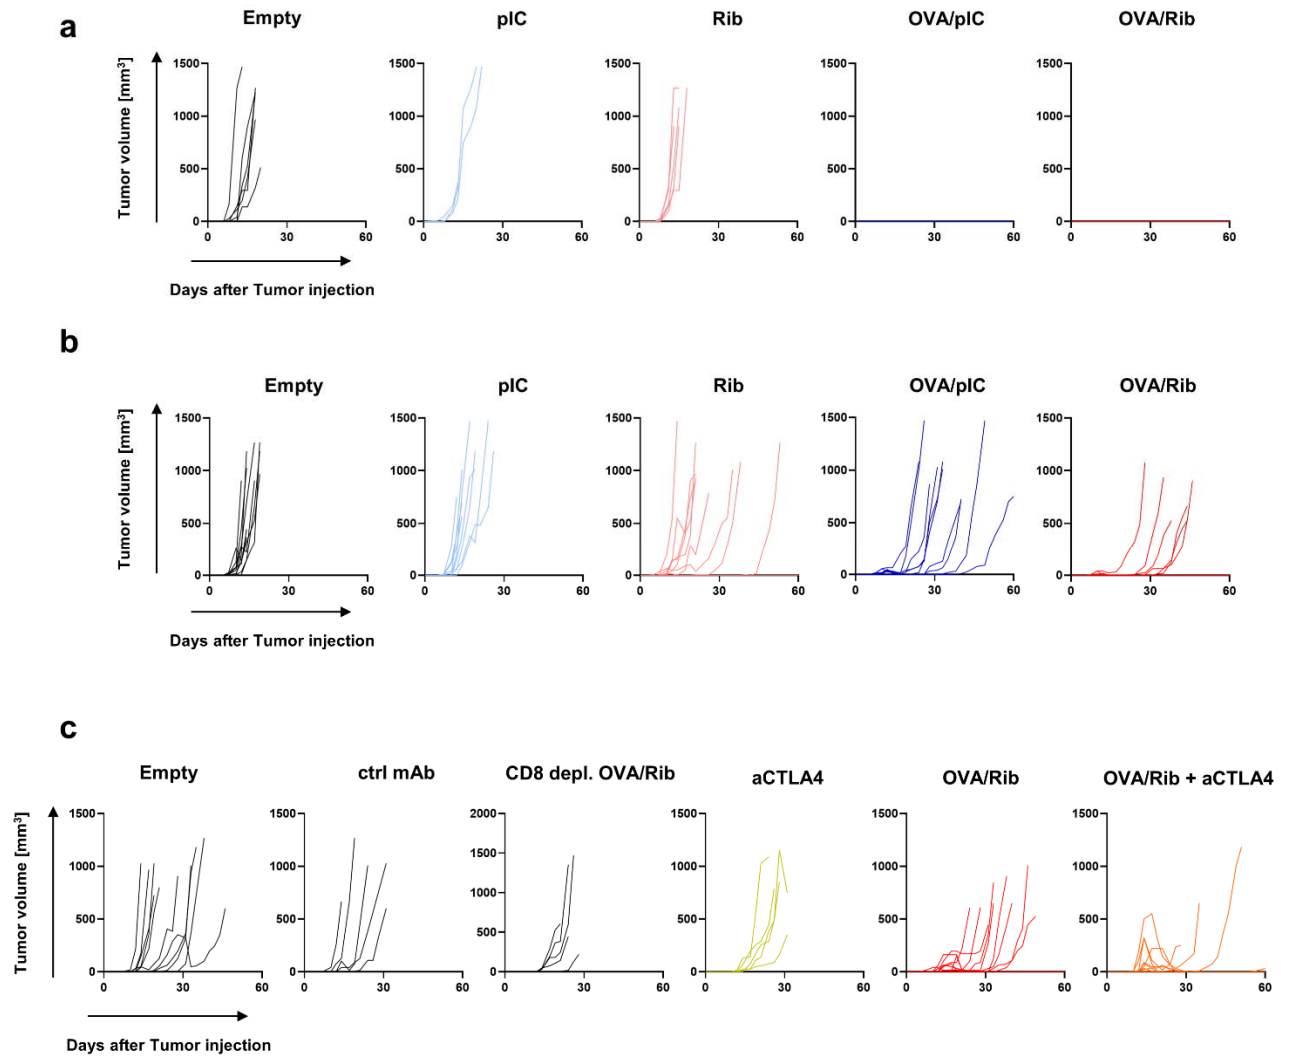

**Supplementary Fig. 12 | Individual tumor growth data. a,b,c,** Spider-plots of tumor growth of individual mice related to Figure 5a (a), Figure 5c (b) and Figure 6b (c).

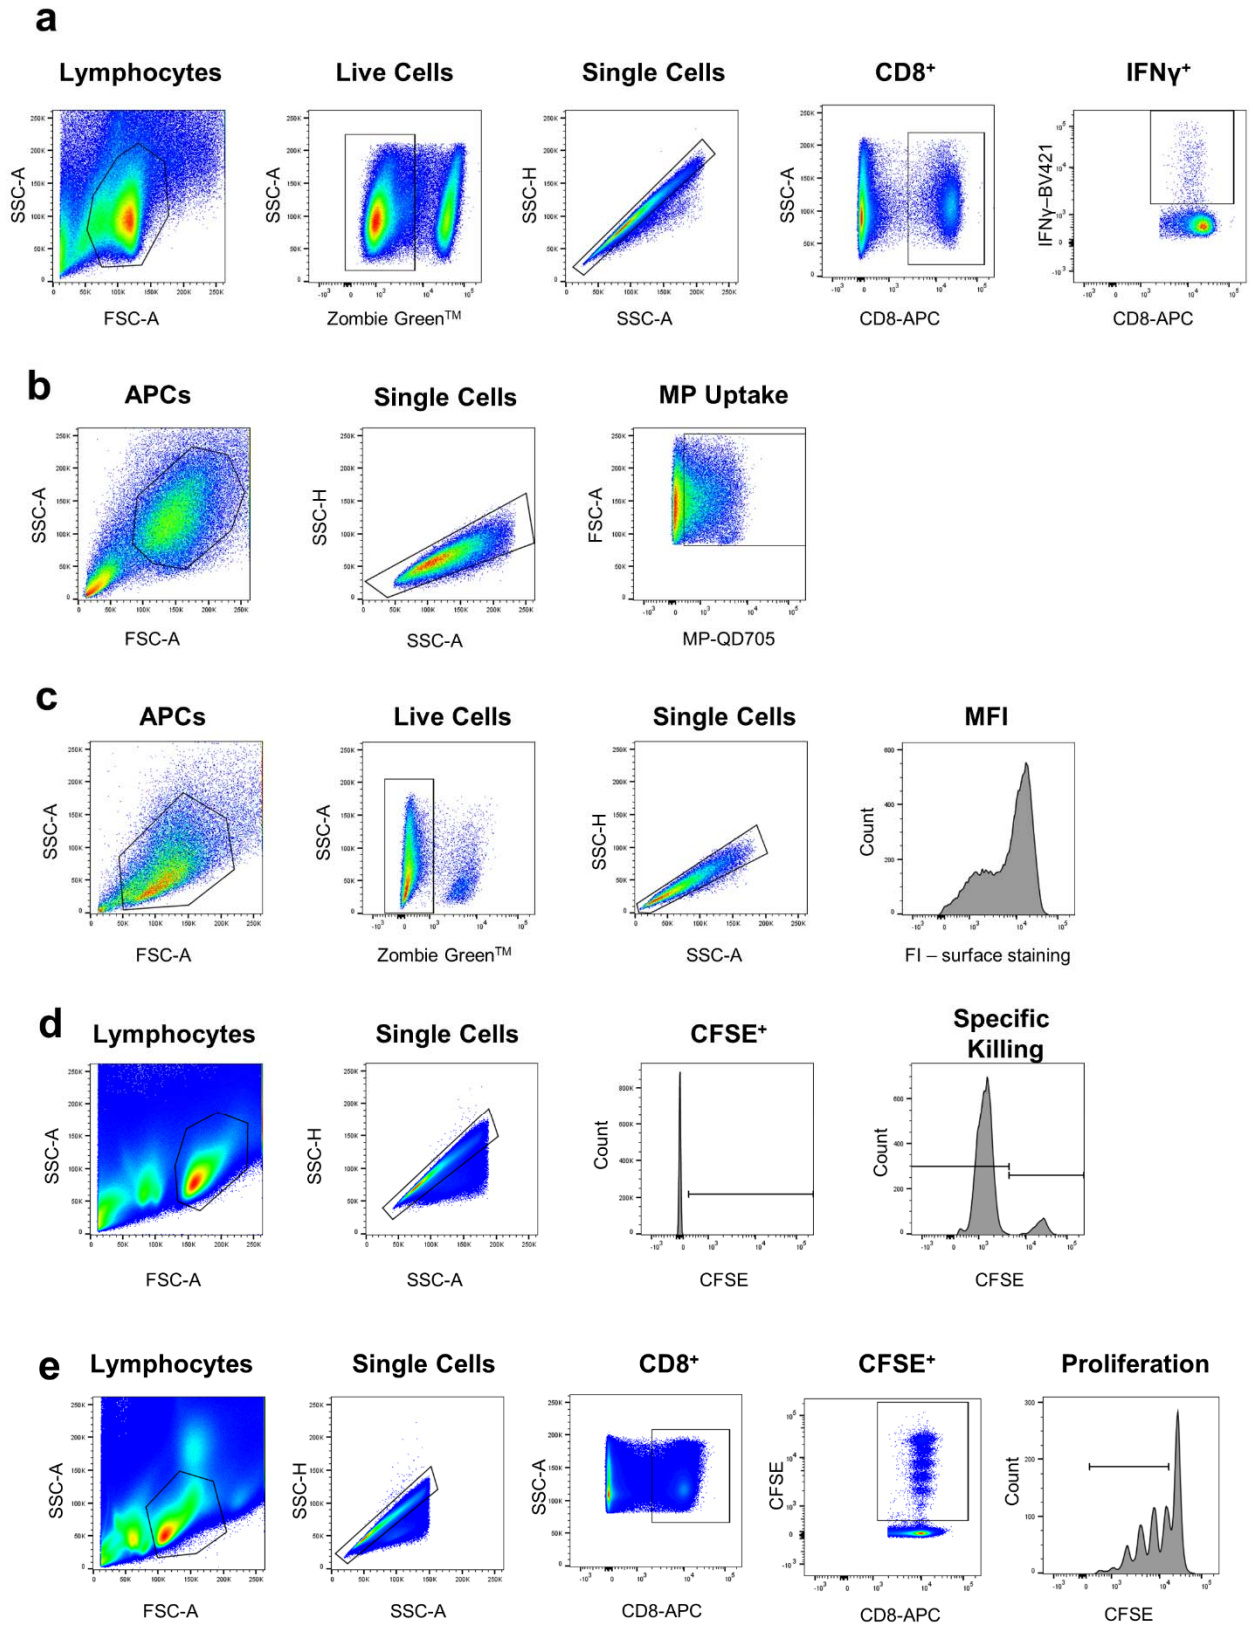

**Supplementary Fig. 13 | Gating strategies used for flow cytometry. a,** Gating strategy to determine the percentage of intracellular IFN $\gamma$  of antigen-specific CD8<sup>+</sup> T cells presented on

Fig. 1c,d, 4a,b,d,g, S1c,e, S7, S8b and Fig. S9a. Cells were gated using FSC/SSC followed by live/dead and singlet (single cells) discrimination with subsequent gating of CD8<sup>+</sup> and IFN $\gamma$ <sup>+</sup> positive CD8<sup>+</sup> cells. **b**, Gating strategy to determine fluorescent particle uptake. Cells were gated using FSC/SSC to determine population of antigen-presenting cells (APC) followed by live/dead and singlet (single cells) discrimination with subsequent gating on MP-QD705 positive signals using the APC-R700 channel. Gating was applied in Fig. 2e and Fig. S2b. **c**, Gating strategy applied for analysis of activation and maturation marker on APCs after addition of soluble or particle bound dsRNA analogues. Cells were gated using FSC/SSC to determine APC population followed by live/dead and singlet discrimination with subsequent gating on positive signals of respective fluorochrome-labeled surface marker. Flow cytometric analysis was performed in Fig. 3a,c and Supplementary Figs. 3a,c,d, and 4b. **d**, Gating strategy to analyze antigen-specific killing of peptide-pulsed target cells in vivo. Cells were gated using FSC/SSC to specify lymphocytes followed by singlet discrimination and subsequent gating on CFSE positive signals. CFSE<sup>+</sup> signals were further gated on CFSE<sup>low</sup> and CFSE<sup>high</sup> populations to determine unpulsed reference cells and peptide-pulsed target cells, respectively. Results are shown in Fig. 4c. **e**, Gating strategy to determine in vitro proliferation of CD8<sup>+</sup> T cells using proliferation and cell tracking dye. Cells were gated using FSC/SSC to specify lymphocytes followed by singlet discrimination and positive gating on CD8-positive cells and CFSE dilutions. Gating was applied in Fig. 4e.



**Supplementary Table 1. List of primers for genotyping**

| Primer Name                         | Sequence (5'-3')                  |
|-------------------------------------|-----------------------------------|
| <i>Mavs</i> <sup>-/-</sup> mice     |                                   |
| <i>Mavs</i> <sup>-/-</sup> mutant   | GTG GAA TGT GTG CGA GGC CAG AGG C |
| <i>Mavs</i> <sup>-/-</sup> wildtype | TAG CTG TGA GGC AGG ACA GGT AAG G |
| <i>Mavs</i> <sup>-/-</sup> common   | AGC CAA GAT TCT AGA AGC TGA GAA   |
| <i>Tlr3</i> <sup>-/-</sup> mice     |                                   |
| <i>Tlr3</i> <sup>-/-</sup> mutant   | GCC AGA GGC CAC TTG TGT AG        |
| <i>Tlr3</i> <sup>-/-</sup> wildtype | GCA ACC CTT TCA AAA ACC AG        |
| <i>Tlr3</i> <sup>-/-</sup> common   | AAT TCA TCA GTG CCA TGA GTT T     |
| AAD mice                            |                                   |
| H2D forward                         | ACG GAA AGT GAA GGC CCA CTC       |
| H2D reverse                         | GCA GCC ATA CAT CCT CTG GAC G     |
| Internal control forward            | CAA ATG TTG CTT GTC TGG TG        |
| Internal control reverse            | GTC AGT CGA GTG CAC AGT TT'       |

**Supplementary Table 2. List of antibodies for flow cytometry**

| Target         | Clone     | Specificity | Source          | Catalog #   | Used at |
|----------------|-----------|-------------|-----------------|-------------|---------|
| CD3ε           | 17A2      | mouse       | BioLegend       | 100204      | 1:200   |
| CD8α           | 53-6.7    | mouse       | Invitrogen      | 17-0081-82  | 1:800   |
| CD8α           | 53-6.7    | mouse       | BioLegend       | 100712      | 1:800   |
| CD8α           | 53-6.7    | mouse       | BioLegend       | 100753      | 1:400   |
| CD40           | 3/23      | mouse       | BioLegend       | 124612      | 1:200   |
| CD80           | 16-10A1   | mouse       | BD Biosciences  | 553769      | 1:400   |
| CD83           | Michel-19 | mouse       | BD Biosciences  | 558206      | 1:400   |
| CD86           | GL1       | mouse       | BD Biosciences  | 560582      | 1:800   |
| CD86           | GL1       | mouse       | BioLegend       | 105012      | 1:800   |
| H-2Kb          | AF6-88.5  | mouse       | BioLegend       | 116508      | 1:600   |
| H-2Kb          | AF6-88.5  | mouse       | BioLegend       | 116518      | 1:600   |
| IFNγ           | XMG1.2    | mouse       | BioLegend       | 506538      | 1:1000  |
| CD1c           | L161      | human       | BioLegend       | 331526      | 1:50    |
| CD1c (BDCA-1)  | REA694    | human       | Miltenyi Biotec | 130-110-594 | 1:20    |
| CD141          | 1A4       | human       | BioLegend       | 565321      | 1:50    |
| CD141 (BDCA-3) | REA674    | human       | Miltenyi Biotec | 130-110-658 | 1:25    |
| CD3ε           | 145-2C11  | human       | BioLegend       | 100306      | 1:50    |
| CD14           | M5E2      | human       | BioLegend       | 301804      | 1:50    |
| CD16           | B73.1     | human       | BioLegend       | 360716      | 1:50    |
| CD19           | HIB19     | human       | BioLegend       | 302206      | 1:50    |
| CD68           | Y1/82A    | human       | BioLegend       | 333806      | 1:50    |
| CD40           | HB14      | human       | BioLegend       | 313006      | 1:25    |
| CD80           | 2D10.4    | human       | Invitrogen      | 17-0809-42  | 1:50    |
| CD80           | 2D10      | human       | BioLegend       | 305222      | 1:50    |
| CD80           | L307      | human       | BD Biosciences  | 557227      | 1:20    |
| CD83           | HB15e     | human       | BD Biosciences  | 551073      | 1:25    |
| CD83           | HB15e     | human       | BioLegend       | 305312      | 1:50    |
| CD83           | HB15e     | human       | BioLegend       | 305324      | 1:100   |

|           |       |       |           |        |       |
|-----------|-------|-------|-----------|--------|-------|
| CD86      | BU63  | human | BioLegend | 374208 | 1:100 |
| CD86      | BU63  | human | BioLegend | 374212 | 1:100 |
| CD86      | BU63  | human | BioLegend | 374214 | 1:75  |
| CD86      | BU63  | human | BioLegend | 374206 | 1:50  |
| HLA-A2    | BB7.2 | human | BioLegend | 343307 | 1:100 |
| HLA-A,B,C | W6/32 | human | BioLegend | 311432 | 1:150 |
| HLA-A,B,C | W6/32 | human | BioLegend | 311425 | 1:150 |
